# Supplementary material for: Complementary Untargeted and Targeted Metabolomics for Differentiation of Extra Virgin Olive Oils of Different Origin of Purchase Based on Volatile and Phenolic Composition and Sensory Quality
Source: MDPI journal article supplement (doi:10.3390/molecules24162896), 2019-08-09
Supplement: s1 [file s1]

**Table S1.** Standards used for all the analysis

| <b>Class</b>     | <b>Compound</b>         | <b>CAS n°</b> | <b>Chemical formula</b>                       | <b>Furnisher</b> |
|------------------|-------------------------|---------------|-----------------------------------------------|------------------|
| <b>Acids</b>     |                         |               |                                               |                  |
|                  | 3-methylbutanoic acid   | 503-74-2      | C <sub>5</sub> H <sub>10</sub> O <sub>2</sub> | Sigma            |
|                  | Acetic acid             | 64-19-7       | C <sub>2</sub> H <sub>4</sub> O <sub>2</sub>  | Sigma            |
|                  | Butanoic acid           | 107-92-6      | C <sub>4</sub> H <sub>8</sub> O <sub>2</sub>  | Sigma            |
|                  | Formic acid             | 64-18-6       | CH <sub>2</sub> O <sub>2</sub>                | Fluka            |
|                  | Heptanoic acid          | 111-14-8      | C <sub>7</sub> H <sub>14</sub> O <sub>2</sub> | Sigma            |
|                  | Hexanoic acid           | 142-62-1      | C <sub>6</sub> H <sub>12</sub> O <sub>2</sub> | Fluka            |
|                  | Nonanoic acid           | 112-05-0      | C <sub>9</sub> H <sub>18</sub> O <sub>2</sub> | Aldrich          |
|                  | Octanoic acid           | 124-07-2      | C <sub>8</sub> H <sub>16</sub> O <sub>2</sub> | Aldrich          |
|                  | Pentanoic acid          | 109-52-4      | C <sub>5</sub> H <sub>10</sub> O <sub>2</sub> | Aldrich          |
|                  | Propionic acid          | 79-09-4       | C <sub>3</sub> H <sub>6</sub> O <sub>2</sub>  | Aldrich          |
|                  | Sorbic acid             | 110-44-1      | C <sub>6</sub> H <sub>8</sub> O <sub>2</sub>  | Sigma            |
| <b>Alcohols</b>  |                         |               |                                               |                  |
|                  | 1-hexanol               | 111-27-3      | C <sub>6</sub> H <sub>14</sub> O              | Aldrich          |
|                  | 1-nonanol               | 143-08-8      | C <sub>9</sub> H <sub>20</sub> O              | Aldrich          |
|                  | 1-octanol               | 111-87-5      | C <sub>8</sub> H <sub>18</sub> O              | Aldrich          |
|                  | (E)2-hexen-1-ol         | 928-95-0      | C <sub>6</sub> H <sub>12</sub> O              | Sigma            |
|                  | (Z)3-hexen-1-ol         | 928-96-1      | C <sub>6</sub> H <sub>12</sub> O              | Sigma            |
|                  | 3-methyl-1-butanol      | 123-51-3      | C <sub>5</sub> H <sub>12</sub> O              | Sigma            |
|                  | Benzene methanol        | 100-51-6      | C <sub>7</sub> H <sub>8</sub> O               | Fluka            |
|                  | Ethanol                 | 64-17-5       | C <sub>2</sub> H <sub>6</sub> O               | Sigma            |
|                  | Menthol                 | 2216-51-5     | C <sub>10</sub> H <sub>20</sub> O             | Sigma            |
|                  | Phenylethyl alcohol     | 60-12-8       | C <sub>8</sub> H <sub>10</sub> O              | Aldrich          |
| <b>Aldehydes</b> |                         |               |                                               |                  |
|                  | (E)1,2-pentenal         | 1576-87-0     | C <sub>5</sub> H <sub>8</sub> O               | Sigma            |
|                  | 2,4-hexadienal          | 80466-34-8    | C <sub>6</sub> H <sub>8</sub> O               | Sigma            |
|                  | (E)2-hexenal            | 6728-26-3     | C <sub>6</sub> H <sub>10</sub> O              | Aldrich          |
|                  | 2-methyl-butanal        | 96-17-3       | C <sub>5</sub> H <sub>10</sub> O              | Fluka            |
|                  | Benzaldehyde            | 100-52-7      | C <sub>7</sub> H <sub>6</sub> O               | Fluka            |
|                  | (Z)3-hexenal            | 6789-80-6     | C <sub>6</sub> H <sub>10</sub> O              | Fluka            |
|                  | Hexanal                 | 66-25-1       | C <sub>6</sub> H <sub>12</sub> O              | Sigma            |
|                  | Nonanal                 | 124-19-6      | C <sub>9</sub> H <sub>18</sub> O              | Sigma            |
|                  | Octanal                 | 124-13-0      | C <sub>8</sub> H <sub>16</sub> O              | Sigma            |
|                  | Pentanal                | 110-62-3      | C <sub>5</sub> H <sub>10</sub> O              | Sigma            |
| <b>Ketones</b>   |                         |               |                                               |                  |
|                  | 1-penten-3-one          | 1629-58-9     | C <sub>5</sub> H <sub>8</sub> O               | Sigma            |
|                  | 3-pentanone             | 96-22-0       | C <sub>5</sub> H <sub>10</sub> O              | Sigma            |
|                  | 4-methyl-2-pentanone    | 108-10-1      | C <sub>6</sub> H <sub>12</sub> O              | Sigma            |
| <b>Esters</b>    |                         |               |                                               |                  |
|                  | (E)2-hexen-1-ol acetate | 2497-18-9     | C <sub>8</sub> H <sub>14</sub> O <sub>2</sub> | Aldrich          |
|                  | (Z)3-hexen-1-ol acetate | 3681-82-1     | C <sub>8</sub> H <sub>14</sub> O <sub>2</sub> | Aldrich          |
|                  | Ethyl acetate           | 141-78-6      | C <sub>4</sub> H <sub>8</sub> O <sub>2</sub>  | Sigma            |
|                  | Ethyl benzene           | 93-89-0       | C <sub>9</sub> H <sub>10</sub> O <sub>2</sub> | Sigma            |

|                            |            |                                                 |         |
|----------------------------|------------|-------------------------------------------------|---------|
| Hexyl acetate              | 142-92-7   | C <sub>8</sub> H <sub>16</sub> O <sub>2</sub>   | Sigma   |
| <b><i>Phenols</i></b>      |            |                                                 |         |
| 2-methoxy phenol           | 90-05-1    | C <sub>7</sub> H <sub>8</sub> O <sub>2</sub>    | Sigma   |
| OH-tyrosol                 | 10597-60-1 | C <sub>8</sub> H <sub>10</sub> O <sub>3</sub>   | Sigma   |
| Tyrosol                    | 501-94-0   | C <sub>8</sub> H <sub>10</sub> O <sub>2</sub>   | Sigma   |
| Vanillin                   | 121-33-5   | C <sub>8</sub> H <sub>8</sub> O <sub>3</sub>    | Sigma   |
| p-coumaric acid            | 501-98-4   | C <sub>9</sub> H <sub>8</sub> O <sub>3</sub>    | Sigma   |
| Oleuropein                 | 32619-42-4 | C <sub>25</sub> H <sub>32</sub> O <sub>13</sub> | Sigma   |
| Pinoresinol                | 487-36-5   | C <sub>20</sub> H <sub>22</sub> O <sub>6</sub>  | Sigma   |
| Vanillic acid              | 121-34-6   | C <sub>8</sub> H <sub>8</sub> O <sub>4</sub>    | Sigma   |
| Phenol                     | 108-95-2   | C <sub>6</sub> H <sub>6</sub> O                 | Sigma   |
| <b><i>Hydrocarbons</i></b> |            |                                                 |         |
| β-ocimene                  | 13877-91-3 | C <sub>10</sub> H <sub>16</sub>                 | Sigma   |
| Copaene                    | 3856-25-5  | C <sub>15</sub> H <sub>24</sub>                 | Sigma   |
| Limonene                   | 138-86-3   | C <sub>10</sub> H <sub>16</sub>                 | Sigma   |
| Octane                     | 111-65-9   | C <sub>8</sub> H <sub>18</sub>                  | Sigma   |
| Valencene                  | 4630-07-3  | C <sub>15</sub> H <sub>24</sub>                 | Aldrich |
