# Supplementary material for: Complementary Untargeted and Targeted Metabolomics for Differentiation of Extra Virgin Olive Oils of Different Origin of Purchase Based on Volatile and Phenolic Composition and Sensory Quality
Source: MDPI journal article supplement (doi:10.3390/molecules24162896), 2019-08-09
Supplement: s1 [file s1]

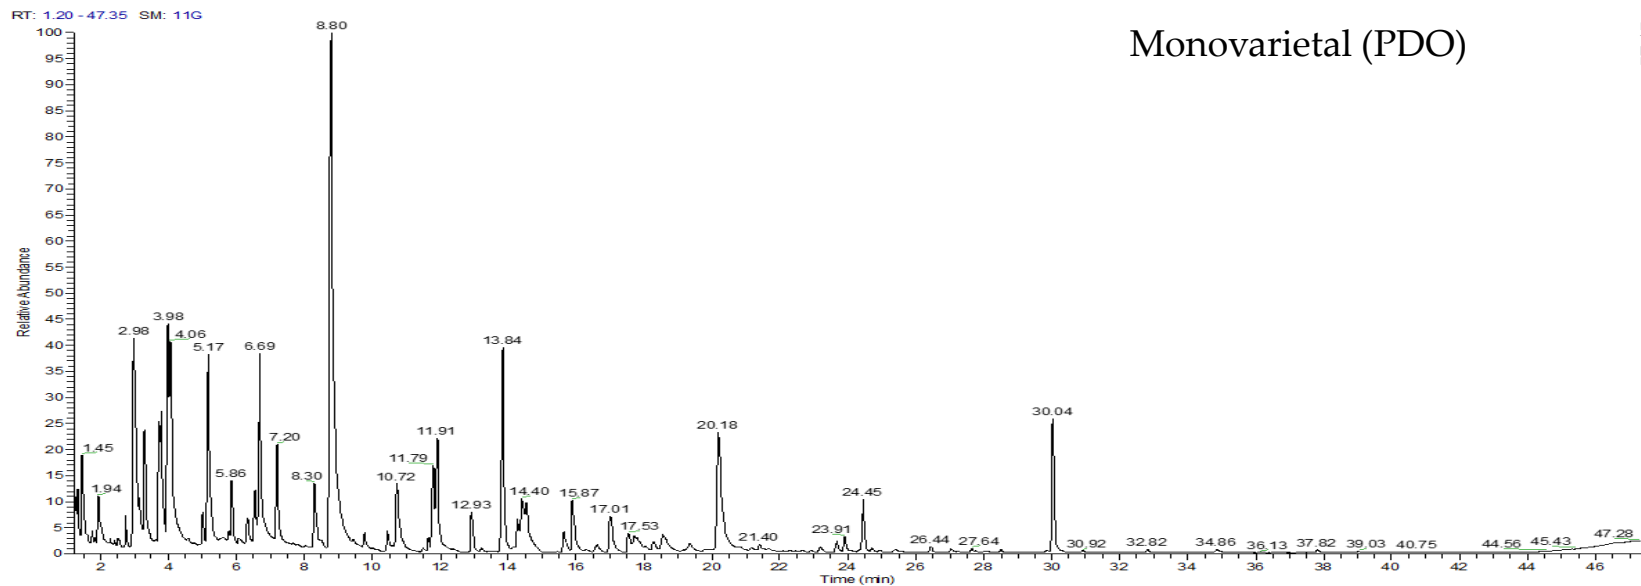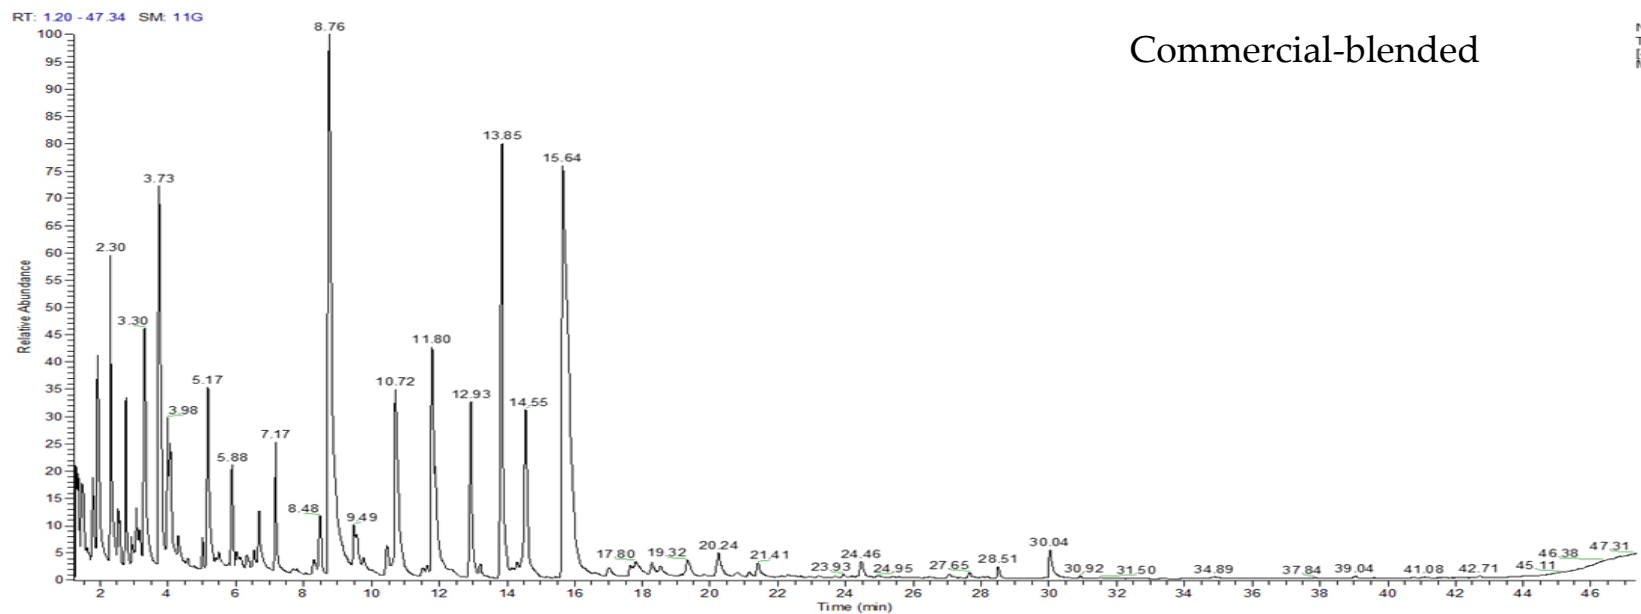

**Figure S1:** Chromatograms of volatile aroma compounds found in monovarietal PDO and commercial-blended extra virgin olive oil by headspace solid-phase microextraction combined with gas chromatography / mass spectrometry (HS-SPME-GC-MS/MS).

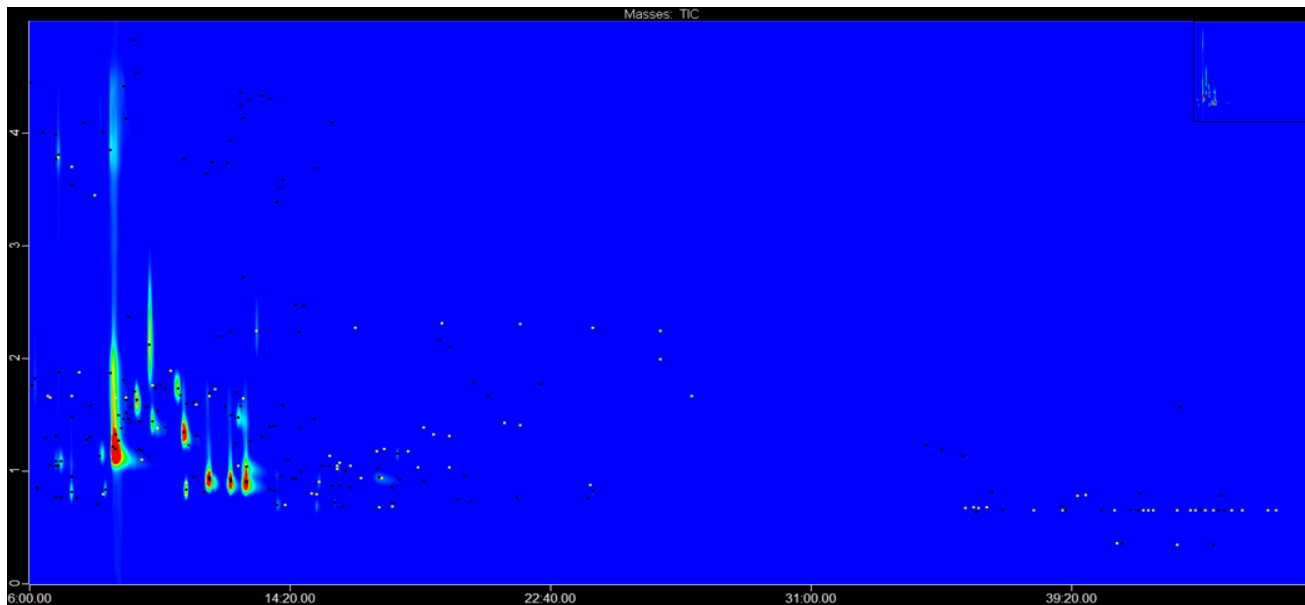

Monovarietal (PDO)

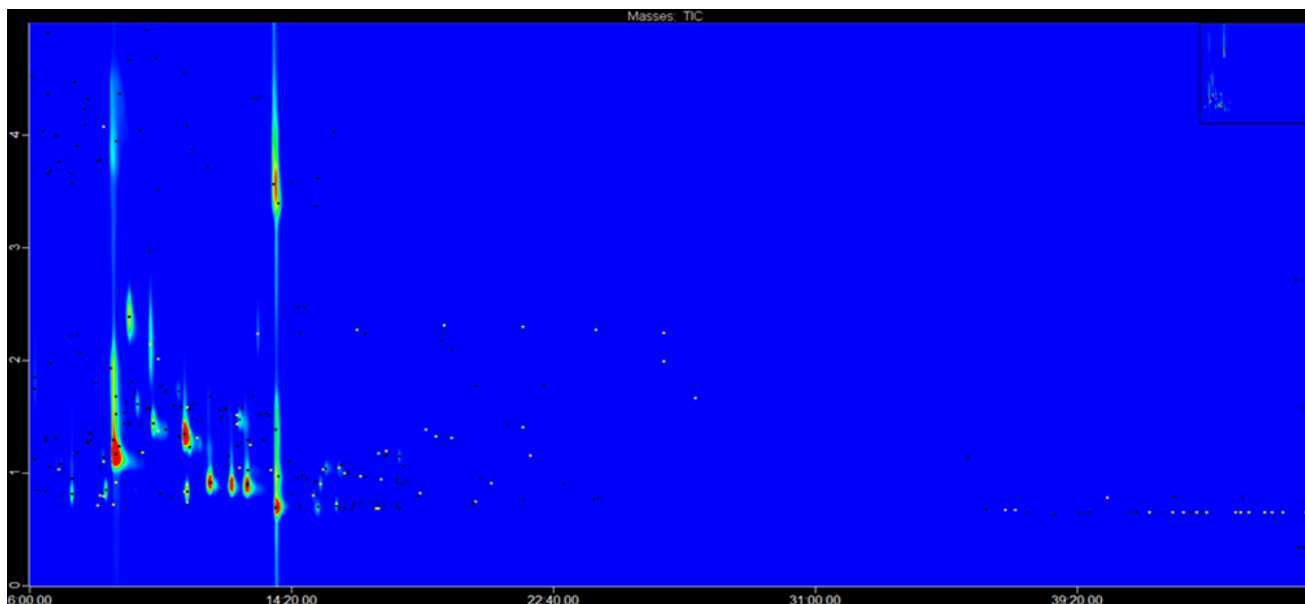

Commercial-blended

**Figure S2:** Contour plots (2D-chromatograms) of volatile aroma compounds found in monovarietal PDO and commercial-blended extra virgin olive oils by headspace solid-phase microextraction combined with comprehensive two-dimensional gas chromatography-mass spectrometry (HS-SPME-GC×GC-TOF-MS).

# Monovarietal (PDO)

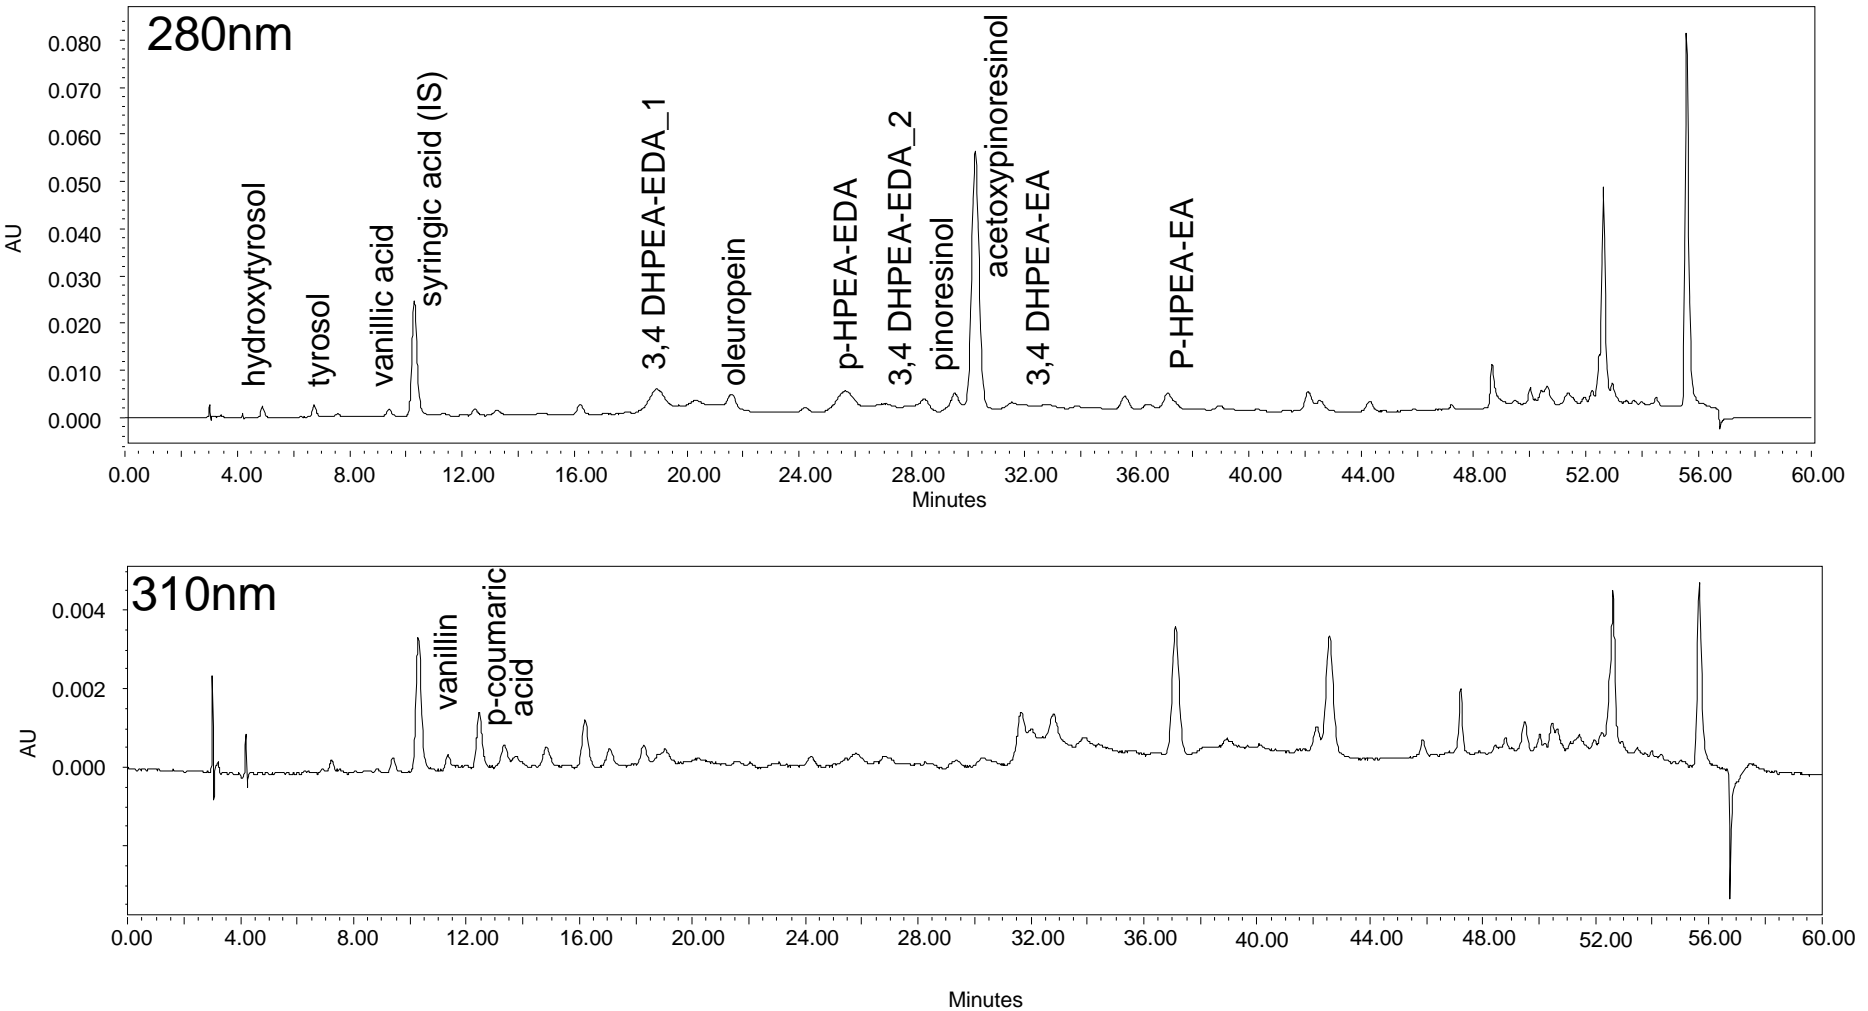

**Figure S3:** Chromatograms of phenols found in monovarietal PDO and commercial-blended extra virgin olive oils by high-performance liquid chromatography with UV at wavelength of 280 nm and 310 nm respectively.

## Commercial-blended

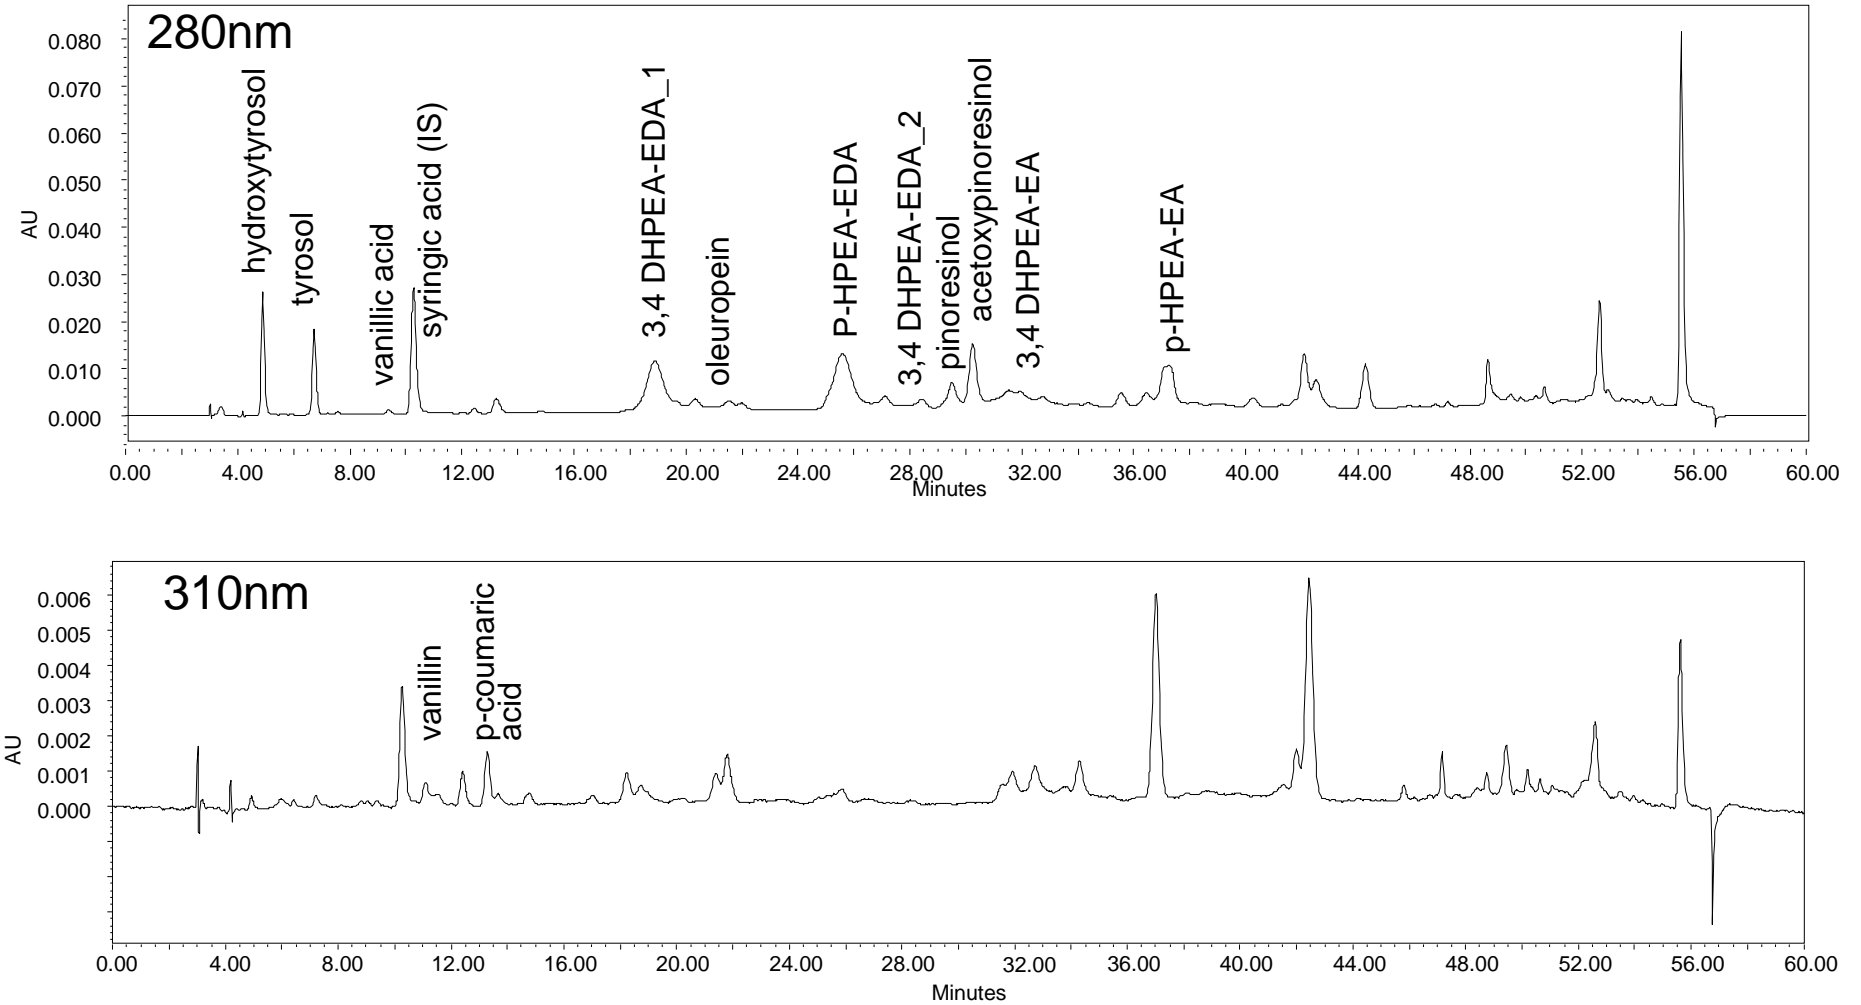

**Figure S3:** Chromatograms of phenols found in monovarietal PDO and commercial-blended extra virgin olive oils by high-performance liquid chromatography with UV at wavelength of 280 nm and 310 nm respectively.

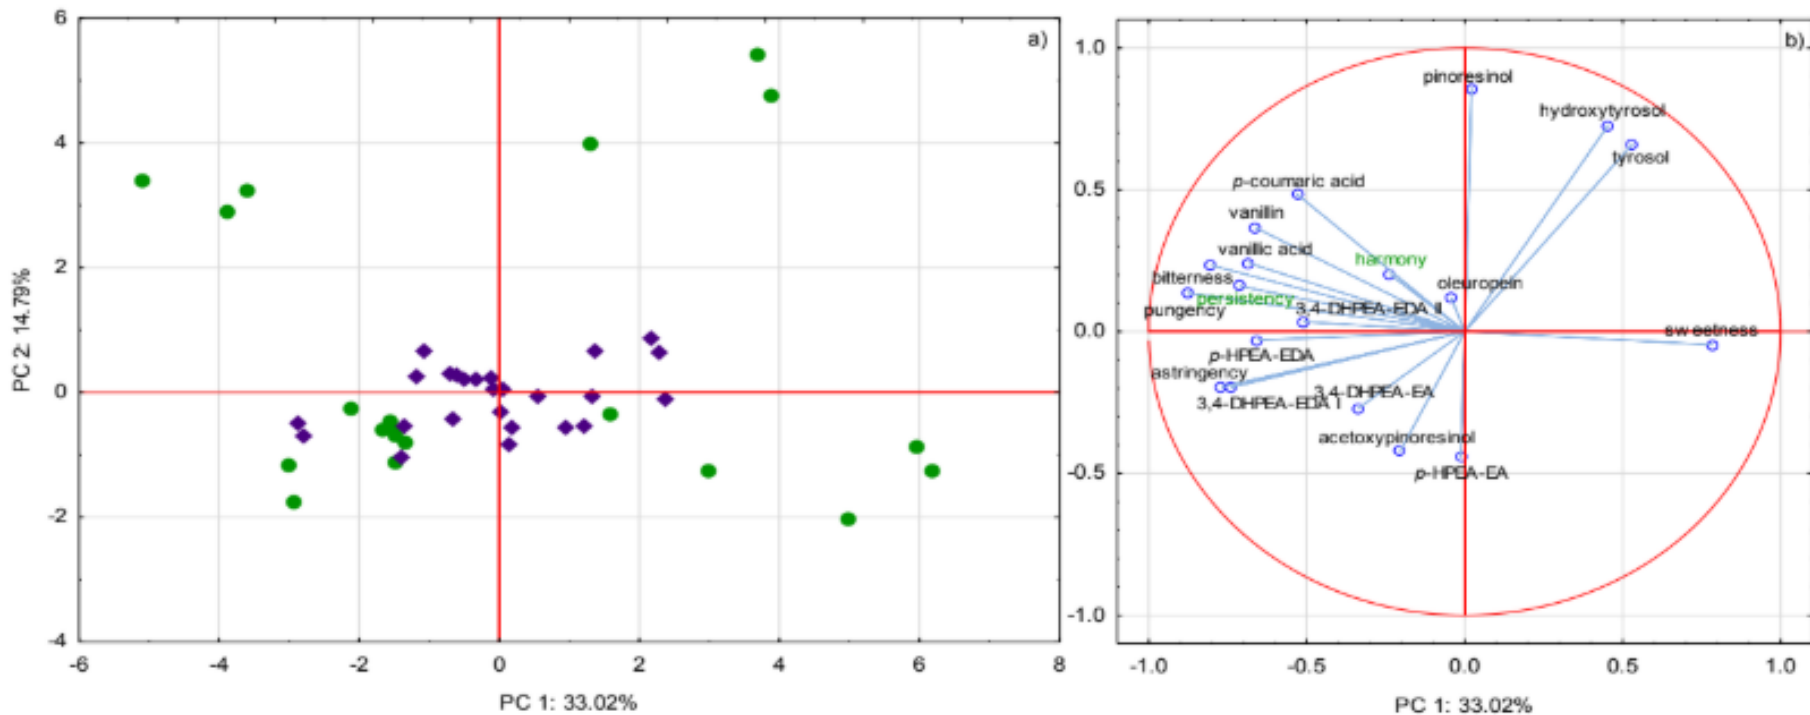

**Figure S4:** Principal component analysis (PCA) of HPLC-DAD-MS data; (a) indicates the score plot with all compounds; (b) loading plot correlated with sensory attributes in EVOO samples
